# Supplementary figures and images for: Resveratrol down-regulates a glutamate-induced tissue plasminogen activator via Erk and AMPK/mTOR pathways in rat primary cortical neurons
Source: Royal Society of Chemistry journal article supplement (doi:10.1039/c3fo60397k), 2014-01-01

## Supplementary data 1.

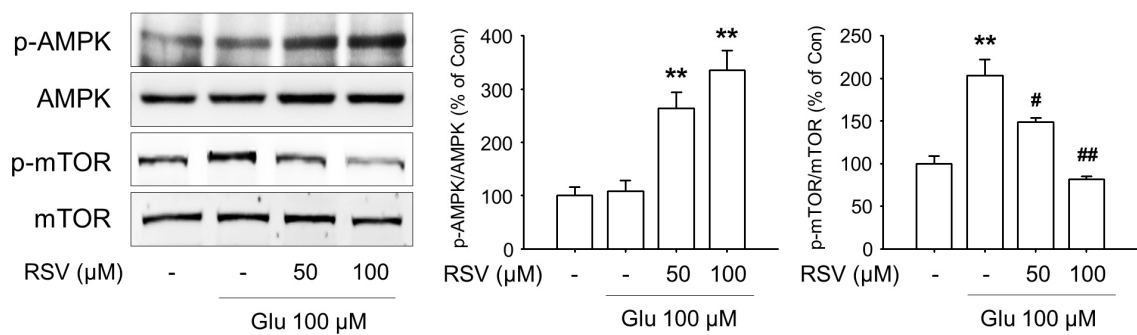

Supplement: c3fo60397k2.pdf [file c3fo60397k2.pdf]
